# Supplementary material
Source: publisher site journal article supplement (https://www.dovepress.com/article/320866)
Supplement: Supplementary file 1 [file get_supplementary_file.php]

**Translation, cultural adaptation and validation of General Medication Adherence Scale (GMAS) into the Nepali language**

**Rajeev Shrestha1, Binaya Sapkota2, Asmita Priyadarshini Khatiwada3, Sunil Shrestha4, Saval Khanal5, Bhuvan KC4, Vibhu Paudyal6**

1Department of Pharmacy, District Hospital Lamjung, Besisahar, Province Gandaki, Nepal

2Department of Pharmaceutical Sciences, Nobel College, Affiliated to Pokhara University, Kathmandu, Province Bagmati, Nepal

3Department of Pharmaceutical and Health Service Research, Nepal Health Research and Innovation Foundation, Lalitpur, Province Bagmati, Nepal

4School of Pharmacy, Monash University Malaysia, Jalan Lagoon Selatan, 47500, Bandar Sunway,, Selangor, Malaysia5Division of Health Sciences, Warwick Medical School, University of Warwick, Coventry, United Kingdom

6Institute of Clinical Sciences, College of Medical and Dental Sciences, University of Birmingham, Birmingham, United Kingdom

**Supplementary Tables and Figure**

**Supplementary Table 1: Disease details of study patients**

| Disease condition | ICD classification | Frequency (%) [N=220] |
| --- | --- | --- |
| Anxiety | F41.9 | 4 (1.8) |
| Anxiety + Hypertension | F 41.9; I10 | 1 (0.5) |
| Arthritis | M13.9 | 3 (1.4) |
| Arthritis + Diabetes | M13.9; E14 | 1 (0.5) |
| Arthritis + Hypertension | M13.9; I10 | 2 (0.9) |
| Arthritis + Hyperthyroidism + Hypertension | M13.9; E05.9; I10 | 2 (0.9) |
| Asthma | J45.9- | 5 (2.3) |
| Asthma + Hypertension | J45.9; I10 | 2 (0.9) |
| Asthma + Hyperthyroidism | J45.9; E05.9 | 1 (0.5) |
| Chronic kidney disease | N18.9 | 1 (0.5) |
| COPD | J44.9 | 15 (6.8) |
| COPD + Epilepsy | J44.9; G40.9 | 3 (1.4) |
| COPD + Hypertension | J44.9; I10 | 3 (1.4) |
| COPD + Hypertension + Hyperlipidemia | J44.9; I10; E78.5 | 2 (0.9) |
| COPD +Hypertension+ Diabetes | J44.9; I10; E11 | 1 (0.5) |
| Depression | F32.9- | 4 (1.8) |
| Diabetes + Gout | E14; M10.9 | 1 (0.5) |
| Diabetes + Hypertension + Gout | E11; I10; M10.9 | 1 (0.5) |
| Diabetes + Mental disorder | E11; F99 | 2 (0.9) |
| Diabetes +Anxiety | E11; F41.9 | 1 (0.5) |
| Diabetes +Hypertension + Parkinsonism | E14; I10; G20 | 1 (0.5) |
| Diabetes+ Hypothyroidism + Hyperlipidemia | E14; E03.9; E78.5 | 2 (0.9) |
| Epilepsy | G40.9 | 8 (3.6) |
| Epilepsy + Anxiety | G40.9; F41.9 | 2 (0.9) |
| Gout + Hypertension + Hyperlipidemia | M10.9; I10; E78.5 | 1 (0.5) |
| Hyperlipidemia | E78.5 | 4 (1.8) |
| Hyperlipidemia + Hypertension | E78.5; I10 | 10 (4.5) |
| Hypertension | I10 | 51 (23.2) |
| Hypertension + Chronic kidney disease | I10; N18.9 | 1 (0.5) |
| Hypertension + Hyperthyroidism | I10; E05.9 | 1 (0.5) |
| Hypertension + Type 2 Diabetes Mellitus | I10; E11 | 19 (8.6) |
| Hypertension + Type 2 Diabetes Mellitus + Arthritis | I10; E14; M13.9 | 2 (0.9) |
| Hypertension + Type 2 Diabetes mellitus + Hyperlipidemia | I10; E11; E78.5 | 1 (0.5) |
| Hypertension +Type 2 Diabetes mellitus | I10; E11 | 1 (0.5) |
| Hypertension+ Type 2 Diabetes mellitus + Hyperlipidemia | I10; E11;E78.5 | 9 (4.1) |
| Hyperthyroidism | E05.9 | 6 (2.7) |
| Hyperthyroidism + Type 2 Diabetes mellitus + Hypertension | E05.9; E11; I10 | 3 (1.4) |
| Hypothyroidism | E03.9 | 1 (0.5) |
| Hypothyroidism +Anxiety | E03.9; F41.9 | 1 (0.5) |
| Liver cirrhosis | K74.6 | 1 (0.5) |
| Migraine | G43.9 | 3 (1.4) |
| Psychosis + Hypertension + Hyperlipidemia | F29; I10; E78.5 | 1 (0.5) |
| Sickle cell anemia | D57.1 | 1 (0.5) |
| SLE (Lupus nephritis) | M32.1 | 1 (0.5) |
| Stroke + Type 2 Diabetes mellitus | I64: E11 | 1 (0.5) |
| Type 2 Diabetes Mellitus | E11 | 27 (12.3) |
| Type 2 Diabetes mellitus with diabetic neuropathy | E11.40 | 3 (1.4) |
| Vitamin D deficiency | E55.9 | 1 (0.5) |
| Vitamin D deficiency + Arthritis | E55.9; M13.9 | 2 (0.9) |

**Supplementary Table 2: Measure of sample adequacy**

|  | KMO statistic | Overall KMO statistic | Bartlett test of homogeneity of variances |
| --- | --- | --- | --- |
| GMAS1 | 0.81 | 0.83 (meritorious or great) | K2 (10) = 126.95, p-value < 2.2X10-16 |
| GMAS2 | 0.80 |
| GMAS3 | 0.88 |
| GMAS4 | 0.81 |
| GMAS5 | 0.79 |
| GMAS6 | 0.87 |
| GMAS7 | 0.86 |
| GMAS8 | 0.82 |
| GMAS9 | 0.85 |
| GMAS10 | 0.85 |
| GMAS11 | 0.80 |

**Supplementary Table 3: Correlation Matrix (R-matrix)**

| Items | GMAS1 | GMAS2 | GMAS3 | GMAS4 | GMAS5 | GMAS6 | GMAS7 | GMAS8 | GMAS9 | GMAS10 | GMAS11 |
| --- | --- | --- | --- | --- | --- | --- | --- | --- | --- | --- | --- |
| GMAS1 | 1.00 | 0.43 | 0.17 | 0.16 | 0.36 | 0.26 | 0.41 | 0.30 | 0.23 | 0.25 | 0.19 |
| GMAS2 | 0.43 | 1.00 | 0.14 | 0.15 | 0.18 | 0.23 | 0.34 | 0.37 | 0.13 | 0.26 | 0.20 |
| GMAS3 | 0.17 | 0.14 | 1.00 | 0.29 | 0.35 | 0.27 | 0.29 | 0.30 | 0.18 | 0.21 | 0.12 |
| GMAS4 | 0.16 | 0.15 | 0.29 | 1.00 | 0.37 | 0.35 | 0.25 | 0.34 | 0.12 | 0.29 | 0.11 |
| GMAS5 | 0.36 | 0.18 | 0.35 | 0.37 | 1.00 | 0.24 | 0.39 | 0.31 | 0.35 | 0.24 | 0.13 |
| GMAS6 | 0.26 | 0.23 | 0.27 | 0.35 | 0.24 | 1.00 | 0.39 | 0.50 | 0.35 | 0.54 | 0.36 |
| GMAS7 | 0.41 | 0.34 | 0.29 | 0.25 | 0.39 | 0.39 | 1.00 | 0.56 | 0.36 | 0.35 | 0.27 |
| GMAS8 | 0.30 | 0.37 | 0.30 | 0.34 | 0.31 | 0.50 | 0.56 | 1.00 | 0.39 | 0.56 | 0.21 |
| GMAS9 | 0.23 | 0.13 | 0.18 | 0.12 | 0.35 | 0.35 | 0.36 | 0.39 | 1.00 | 0.35 | 0.26 |
| GMAS10 | 0.25 | 0.26 | 0.21 | 0.29 | 0.24 | 0.54 | 0.35 | 0.56 | 0.35 | 1.00 | 0.36 |
| GMAS11 | 0.19 | 0.20 | 0.12 | 0.11 | 0.13 | 0.36 | 0.27 | 0.21 | 0.26 | 0.36 | 1.00 |
| Determinant = 0.05119 | | | | | | | | | | | |


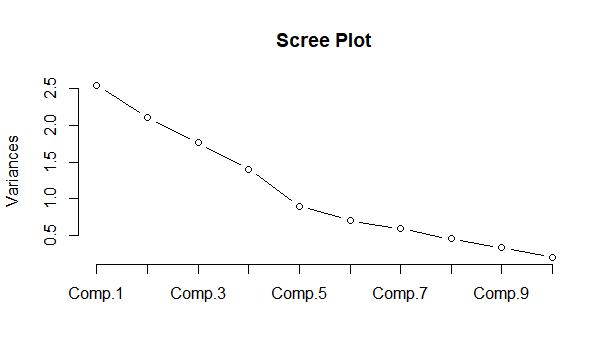


**Supplementary Figure 1: Scree plot**
